# Supplementary material
Source: HighWire-hosted journal article supplement (https://gpsych.bmj.com/content/31/1/e000003)
Supplement: inline-supplementary-material-1 [file inline-supplementary-material-1.docx]

**基于局部一致性方法的述情障碍相关脑自发活性研究**

韩岱，李梅，梅敏君，孙小菲

**背景：**述情障碍是一种多元人格障碍。

**目的：**运用局部一致性（Reho）法测量静息状态脑自发活性以调查述情障碍的神经病理学机制。

**方法：**从大学新生中招募述情障碍学生和非述情障碍学生。用多伦多述情障碍量表（TAS-20）评估被试的述情障碍状况。运用静息态磁共振技术测量（rs-fMRI）被试脑神经自发活性特征。

**结果：**研究结果表明述情障碍被试的多个脑区的Reho值和对照组被试的存在显著差异。但是只有岛叶的Reho值和述情障碍量表的难以辨别情绪（DIF）因子分正性相关。而舌回、中央前回和中央后回的Reho值与难以描述情绪（DDF）因子分正性相关，背内侧前额叶（DMPFC_R）的Reho值与外向性思维（EOT）因子分呈负相关。

**结论：**总之，这些结果表明特定的述情障碍症状与特定的脑功能相关。而岛叶、舌回、中央前回、中央后回和DMPFC_R的功能与述情障碍的关系值得进一步调查。

**关键词：**局部一致性，岛叶，舌回，中央前回，中央后回，背内侧前额叶
